# Supplementary material
Source: PubMed Central journal article supplement (PMC3422613)
Supplement: NIHMS372491-supplement-Supp_Material.pdf [file NIHMS372491-supplement-Supp_Material.pdf]

# Web-based Supplementary Materials for “Spatial-Temporal Modeling of the Association between Air Pollution Exposure and Preterm Birth: Identifying Critical Windows of Exposure”

by

Joshua Warren, Montserrat Fuentes, Amy Herring, and Peter Langlois

## 1 Web Appendix A

The final dataset that we analyze for Model 6 consists of  $N = 43,607$  women with full covariate information. There are 3,458 (7.93%) preterm births in the data. The fitting of the model, including the MCMC analysis, is handled using the R Statistical Software package. The following section is valid for the fixed pollution exposure case.

### 1.1 Basic Setup

$$Y_i | \boldsymbol{\beta}, \boldsymbol{\theta} \stackrel{ind}{\sim} \text{Bernoulli} \{p_i(\boldsymbol{\beta}, \boldsymbol{\theta})\}; \quad i = 1, \dots, N$$

$$\Phi^{-1} \{p_i(\boldsymbol{\beta}, \boldsymbol{\theta})\} = \mathbf{x}_i^T \boldsymbol{\beta} + \mathbf{z}_i^T \boldsymbol{\theta} \{ \mathbf{B}(\mathbf{s}_i) \} = \mathbf{x}_i^T \boldsymbol{\beta} + \mathbf{z}_i^{*T} \boldsymbol{\theta}$$

- $\mathbf{B}(\mathbf{s}) \in \{\mathbf{s}_1^*, \dots, \mathbf{s}_L^*\}$
- $\mathbf{x}_i = p$  dimensional column vector of included covariates for birth  $i$
- $\mathbf{z}_i = J * M$  dimensional column vector of weekly pollution exposure information (PM<sub>2.5</sub> and ozone) for birth  $i$
- $\mathbf{z}_i^* = J * M * L$  dimensional column vector of weekly pollution exposure information with zeros filled in for the non-relevant spatial locations
  - $\mathbf{z}_1^* = (\mathbf{z}_1^T, \mathbf{0}^T, \dots, \mathbf{0}^T)^T$ , if  $\mathbf{B}(\mathbf{s}_1) = \mathbf{s}_1^*$
  - $\mathbf{z}_2^* = (\mathbf{0}^T, \mathbf{z}_2^T, \mathbf{0}^T, \dots, \mathbf{0}^T)^T$ , if  $\mathbf{B}(\mathbf{s}_2) = \mathbf{s}_2^*$
  - etc. . .
- $\boldsymbol{\beta} = (\beta_1, \dots, \beta_p)^T$
- $\boldsymbol{\theta} \{ \mathbf{B}(\mathbf{s}_i) \} = [\theta \{1, 1, \mathbf{B}(\mathbf{s}_i)\}, \dots, \theta \{1, M, \mathbf{B}(\mathbf{s}_i)\}, \dots, \theta \{J, 1, \mathbf{B}(\mathbf{s}_i)\}, \dots, \theta \{J, M, \mathbf{B}(\mathbf{s}_i)\}]^T$ 
  - $\theta \{j, w, \mathbf{B}(\mathbf{s})\} =$  pollutant  $j$ , week  $w$ , location  $\mathbf{s}$  within region  $\mathbf{B}(\mathbf{s})$  pollution coefficient
- $\boldsymbol{\theta} = \{\boldsymbol{\theta}(\mathbf{s}_1^*)^T, \dots, \boldsymbol{\theta}(\mathbf{s}_L^*)^T\}^T$ 
  - J= number of pollutants
  - M= number of weeks
  - L= number of unique spatial locations ( $L \leq N$ )

## 1.2 Priors

- $\boldsymbol{\beta} \sim \text{MVN}(\mathbf{0}, \sigma_{\boldsymbol{\beta}}^2 I_p)$ 
  - $\sigma_{\boldsymbol{\beta}}^2$  fixed, large
- $\boldsymbol{\theta} \sim \text{MVN}(\mathbf{0}, \phi_0 \boldsymbol{\Sigma})$ , where entries of  $\phi_0 \boldsymbol{\Sigma}$  are given by:
 
$$\text{cov} \left\{ \theta(j, w, \mathbf{s}^*), \theta(j', w', \mathbf{s}^{*'}) \right\} = \phi_0 \exp \left\{ -\phi_1 \|\mathbf{s}^* - \mathbf{s}^{*'}\| - \phi_2 |w - w'| - \phi_3 I(j \neq j') \right\}$$
- $\boldsymbol{\Sigma} = \boldsymbol{\Sigma}_1 \otimes \boldsymbol{\Sigma}_2 \otimes \boldsymbol{\Sigma}_3$ 
  - $\boldsymbol{\Sigma}_1 = L \times L$  spatial correlation function;  $\boldsymbol{\Sigma}_1(i, j) = \exp \left( -\phi_1 \|\mathbf{s}_i^* - \mathbf{s}_j^*\| \right)$
  - $\boldsymbol{\Sigma}_2 = J \times J$  pollutant correlation function;  $\boldsymbol{\Sigma}_2(i, j) = \exp \{ -\phi_3 I(i \neq j) \}$
  - $\boldsymbol{\Sigma}_3 = M \times M$  temporal correlation function;  $\boldsymbol{\Sigma}_3(i, j) = \exp (-\phi_2 |w_i - w_j|)$
- $\phi_0 \sim \text{Inverse gamma}(a_0, b_0)$
- $\phi_k \stackrel{\text{ind}}{\sim} \text{Uniform}(a_k, b_k)$ ;  $k = 1, 2, 3$

## 1.3 Latent Variables $W_1, W_2, \dots, W_N$

- $W_i = \mathbf{x}_i^T \boldsymbol{\beta} + \mathbf{z}_i^{*T} \boldsymbol{\theta} + e_i$ ;  $i = 1, \dots, N$ 
  - $e_i \stackrel{\text{iid}}{\sim} N(0, 1)$
- $Y_i = \begin{cases} 0, & \text{if } W_i < 0 \\ 1, & \text{if } W_i \geq 0 \end{cases}$ 
  - $p_i(\boldsymbol{\beta}, \boldsymbol{\theta}) = P(Y_i = 1) = P(W_i \geq 0) = \Phi(\mathbf{x}_i^T \boldsymbol{\beta} + \mathbf{z}_i^{*T} \boldsymbol{\theta})$

## 1.4 Full Conditionals

### 1.4.1 $W_i$ Parameters

$$\begin{aligned} f(W_i | \text{rest}) &\propto f(Y_i | W_i) f(W_i | \boldsymbol{\beta}, \boldsymbol{\theta}) \\ &= P(W_i \geq 0)^{Y_i} \{1 - P(W_i \geq 0)\}^{1-Y_i} \frac{1}{\sqrt{2\pi}} \exp \left\{ -\frac{1}{2} (W_i - \mathbf{x}_i^T \boldsymbol{\beta} - \mathbf{z}_i^{*T} \boldsymbol{\theta})^2 \right\} \\ &\propto \begin{cases} \exp \left\{ -\frac{1}{2} (W_i - \mathbf{x}_i^T \boldsymbol{\beta} - \mathbf{z}_i^{*T} \boldsymbol{\theta})^2 \right\} I(W_i < 0), & \text{if } Y_i = 0 \\ \exp \left\{ -\frac{1}{2} (W_i - \mathbf{x}_i^T \boldsymbol{\beta} - \mathbf{z}_i^{*T} \boldsymbol{\theta})^2 \right\} I(W_i \geq 0), & \text{if } Y_i = 1 \end{cases} \end{aligned}$$

$$W_i | \text{rest} \sim \begin{cases} N(\mathbf{x}_i^T \boldsymbol{\beta} + \mathbf{z}_i^{*T} \boldsymbol{\theta}, 1) I(W_i < 0), & \text{if } Y_i = 0 \\ N(\mathbf{x}_i^T \boldsymbol{\beta} + \mathbf{z}_i^{*T} \boldsymbol{\theta}, 1) I(W_i \geq 0), & \text{if } Y_i = 1 \end{cases}$$

$\Rightarrow W_i | \text{rest} \sim \text{Truncated normal}(\mathbf{x}_i^T \boldsymbol{\beta} + \mathbf{z}_i^{*T} \boldsymbol{\theta}, 1)$ , where the truncation is determined by  $Y_i$

### 1.4.2 $\beta$ Parameters

$$\begin{aligned}
f(\beta|rest) &\propto f(\mathbf{W}|\beta, \boldsymbol{\theta})f(\beta|\sigma_\beta^2) \\
&\propto \left[ \prod_{i=1}^N \frac{1}{\sqrt{2\pi}} \exp \left\{ -\frac{1}{2}(W_i - \mathbf{x}_i^T \beta - \mathbf{z}_i^{*T} \boldsymbol{\theta})^2 \right\} \right] \frac{1}{(2\pi)^{\frac{p}{2}} |\sigma_\beta^2 \mathbf{I}|^{\frac{1}{2}}} \exp \left\{ -\frac{1}{2} \beta^T (\sigma_\beta^2 \mathbf{I})^{-1} \beta \right\} \\
&\propto \exp \left\{ -\frac{1}{2} (\mathbf{W} - X\beta - Z^* \boldsymbol{\theta})^T (\mathbf{W} - X\beta - Z^* \boldsymbol{\theta}) - \frac{1}{2} \beta^T (\sigma_\beta^2 \mathbf{I})^{-1} \beta \right\} \\
&= \exp \left\{ -\frac{1}{2} (\mathbf{W}^T - \beta^T X^T - \boldsymbol{\theta}^T Z^{*T}) (\mathbf{W} - X\beta - Z^* \boldsymbol{\theta}) - \frac{1}{2} \beta^T (\sigma_\beta^2 \mathbf{I})^{-1} \beta \right\} \\
&\propto \exp \left[ -\frac{1}{2} \left\{ -\mathbf{W}^T X\beta - \beta^T X^T \mathbf{W} + \beta^T X^T X\beta + \beta^T X^T Z^* \boldsymbol{\theta} + \boldsymbol{\theta}^T Z^{*T} X\beta + \right. \right. \\
&\quad \left. \left. \beta^T (\sigma_\beta^2 \mathbf{I})^{-1} \beta \right\} \right] \\
&= \exp \left( -\frac{1}{2} \left[ \beta^T \{X^T X + (\sigma_\beta^2 \mathbf{I})^{-1}\} \beta - \beta^T (X^T \mathbf{W} - X^T Z^* \boldsymbol{\theta}) - (\mathbf{W}^T X - \boldsymbol{\theta}^T Z^{*T} X) \beta \right] \right)
\end{aligned}$$

Let  $\boldsymbol{\mu} = X^T \mathbf{W} - X^T Z^* \boldsymbol{\theta}$

$$\begin{aligned}
&\Rightarrow \exp \left( -\frac{1}{2} \left[ \beta^T \{X^T X + (\sigma_\beta^2 \mathbf{I})^{-1}\} \beta - \beta^T \boldsymbol{\mu} - \boldsymbol{\mu}^T \beta \right] \right) \\
&\propto \exp \left( -\frac{1}{2} \left[ \beta^T \{X^T X + (\sigma_\beta^2 \mathbf{I})^{-1}\} - \boldsymbol{\mu}^T \right] \left[ \beta - \{X^T X + (\sigma_\beta^2 \mathbf{I})^{-1}\}^{-1} \boldsymbol{\mu} \right] \right) \\
&= \exp \left( -\frac{1}{2} \left[ \beta^T - \boldsymbol{\mu}^T \{X^T X + (\sigma_\beta^2 \mathbf{I})^{-1}\}^{-1} \right] \{X^T X + (\sigma_\beta^2 \mathbf{I})^{-1}\} \left[ \beta - \{X^T X + (\sigma_\beta^2 \mathbf{I})^{-1}\}^{-1} \boldsymbol{\mu} \right] \right) \\
&= \exp \left( -\frac{1}{2} \left[ \beta - \{X^T X + (\sigma_\beta^2 \mathbf{I})^{-1}\}^{-1} \boldsymbol{\mu} \right]^T \{X^T X + (\sigma_\beta^2 \mathbf{I})^{-1}\} \left[ \beta - \{X^T X + (\sigma_\beta^2 \mathbf{I})^{-1}\}^{-1} \boldsymbol{\mu} \right] \right) \\
&\Rightarrow \beta|rest \sim \text{MVN} \left[ \{X^T X + (\sigma_\beta^2 \mathbf{I})^{-1}\}^{-1} \boldsymbol{\mu}, \{X^T X + (\sigma_\beta^2 \mathbf{I})^{-1}\}^{-1} \right] \\
&\Rightarrow \beta|rest \sim \text{MVN} \left[ \left\{ X^T X + (\sigma_\beta^2 \mathbf{I})^{-1} \right\}^{-1} X^T (\mathbf{W} - Z^* \boldsymbol{\theta}), \left\{ X^T X + (\sigma_\beta^2 \mathbf{I})^{-1} \right\}^{-1} \right]
\end{aligned}$$

### 1.4.3 $\boldsymbol{\theta}$ Parameters

$$\begin{aligned}
f(\boldsymbol{\theta}|rest) &\propto f(\mathbf{W}|\beta, \boldsymbol{\theta})f(\boldsymbol{\theta}|\phi_0, \phi_1, \phi_2, \phi_3) \\
&= \left[ \prod_{i=1}^N \frac{1}{\sqrt{2\pi}} \exp \left\{ -\frac{1}{2}(W_i - \mathbf{x}_i^T \beta - \mathbf{z}_i^{*T} \boldsymbol{\theta})^2 \right\} \right] \frac{1}{(2\pi)^{\frac{J^* M^* L}{2}} |\phi_0 \boldsymbol{\Sigma}|^{\frac{1}{2}}} \exp \left\{ -\frac{1}{2} \boldsymbol{\theta}^T (\phi_0 \boldsymbol{\Sigma})^{-1} \boldsymbol{\theta} \right\} \\
&\propto \exp \left\{ -\frac{1}{2} (\mathbf{W} - X\beta - Z^* \boldsymbol{\theta})^T (\mathbf{W} - X\beta - Z^* \boldsymbol{\theta}) \right\} \exp \left\{ -\frac{1}{2} \boldsymbol{\theta}^T (\phi_0 \boldsymbol{\Sigma})^{-1} \boldsymbol{\theta} \right\} \\
&\propto \exp \left[ -\frac{1}{2} \left\{ -\mathbf{W}^T Z^* \boldsymbol{\theta} + \beta^T X^T Z^* \boldsymbol{\theta} - \boldsymbol{\theta}^T Z^{*T} \mathbf{W} + \boldsymbol{\theta}^T Z^{*T} X\beta + \boldsymbol{\theta}^T Z^{*T} Z^* \boldsymbol{\theta} + \right. \right. \\
&\quad \left. \left. \boldsymbol{\theta}^T (\phi_0 \boldsymbol{\Sigma})^{-1} \boldsymbol{\theta} \right\} \right] \\
&= \exp \left( -\frac{1}{2} \left[ \boldsymbol{\theta}^T \{Z^{*T} Z^* + (\phi_0 \boldsymbol{\Sigma})^{-1}\} \boldsymbol{\theta} - \boldsymbol{\theta}^T (Z^{*T} \mathbf{W} - Z^{*T} X\beta) - (\mathbf{W}^T Z^* - \beta^T X^T Z^*) \boldsymbol{\theta} \right] \right)
\end{aligned}$$

$$\Rightarrow \boldsymbol{\theta}|rest \sim \text{MVN} \left[ \{Z^{*T}Z^* + (\phi_0\boldsymbol{\Sigma})^{-1}\}^{-1} Z^{*T}(\mathbf{W} - X\boldsymbol{\beta}), \{Z^{*T}Z^* + (\phi_0\boldsymbol{\Sigma})^{-1}\}^{-1} \right]$$

#### 1.4.4 $\phi_0$ Parameter

$$\begin{aligned} f(\phi_0|rest) &\propto f(\boldsymbol{\theta}|\phi_0, \phi_1, \phi_2, \phi_3)f(\phi_0) \\ &= \frac{1}{(2\pi)^{\frac{J^*M^*L}{2}} |\phi_0\boldsymbol{\Sigma}|^{\frac{1}{2}}} \exp \left\{ -\frac{1}{2} \boldsymbol{\theta}^T (\phi_0\boldsymbol{\Sigma})^{-1} \boldsymbol{\theta} \right\} \frac{b_0}{\Gamma(a_0)} \phi_0^{-(a_0+1)} \exp \left\{ -\left( \frac{b_0}{\phi_0} \right) \right\} \\ &\propto \frac{1}{\phi_0^{\frac{J^*M^*L}{2}}} \exp \left\{ -\frac{1}{2\phi_0} \boldsymbol{\theta}^T (\boldsymbol{\Sigma})^{-1} \boldsymbol{\theta} \right\} \frac{1}{\phi_0^{a_0+1}} \exp \left\{ -\left( \frac{b_0}{\phi_0} \right) \right\} \\ &= \frac{1}{\phi_0^{\frac{J^*M^*L}{2} + a_0 + 1}} \exp \left\{ -\frac{1}{\phi_0} \left( \frac{\boldsymbol{\theta}^T \boldsymbol{\Sigma}^{-1} \boldsymbol{\theta}}{2} + b_0 \right) \right\} \end{aligned}$$

$$\Rightarrow \phi_0|rest \sim \text{Inverse gamma} \left( \frac{J^*M^*L}{2} + a_0, \frac{\boldsymbol{\theta}^T \boldsymbol{\Sigma}^{-1} \boldsymbol{\theta}}{2} + b_0 \right)$$

#### 1.4.5 $\phi_1, \phi_2,$ and $\phi_3$ Parameters

$$\begin{aligned} f(\phi_1, \phi_2, \phi_3|rest) &\propto f(\boldsymbol{\theta}|\phi_0, \phi_1, \phi_2, \phi_3)f(\phi_1, \phi_2, \phi_3) \\ &= f(\boldsymbol{\theta}|\phi_0, \phi_1, \phi_2, \phi_3)f(\phi_1)f(\phi_2)f(\phi_3) \\ &= \frac{1}{(2\pi)^{\frac{J^*M^*L}{2}} |\phi_0\boldsymbol{\Sigma}|^{\frac{1}{2}}} \exp \left\{ -\frac{1}{2} \boldsymbol{\theta}^T (\phi_0\boldsymbol{\Sigma})^{-1} \boldsymbol{\theta} \right\} \prod_{k=1}^3 \frac{1}{b_k - a_k} \end{aligned}$$

I use the Metropolis-Hastings sampling technique to sample from the full conditional since no conjugate form is available. I transform  $\phi_1, \phi_2,$  and  $\phi_3$  to each have support on  $\mathbb{R}$  so that I can work with Gaussian proposal densities.

$$\begin{aligned} \psi_k &= \ln \left( \frac{\phi_k - a_k}{b_k - \phi_k} \right) \in \mathbb{R}; \quad k = 1, \dots, 3 \\ F_{\psi_k}(\psi) &= P(\psi_k \leq \psi) = P \left\{ \ln \left( \frac{\phi_k - a_k}{b_k - \phi_k} \right) \leq \psi \right\} = F_{\phi_k} \left\{ \frac{b_k \exp(\psi) + a_k}{1 + \exp(\psi)} \right\} \\ \Rightarrow f_{\psi_k}(\psi) &= f_{\phi_k} \left\{ \frac{b_k \exp(\psi) + a_k}{1 + \exp(\psi)} \right\} \left[ \frac{b_k \exp(\psi) \{1 + \exp(\psi)\} - \{b_k \exp(\psi) + a_k\} \exp(\psi)}{\{1 + \exp(\psi)\}^2} \right] \\ &= \frac{1}{b_k - a_k} \left[ \frac{\exp(\psi)(b_k - a_k)}{\{1 + \exp(\psi)\}^2} \right] = \frac{\exp(\psi)}{\{1 + \exp(\psi)\}^2} \\ \Rightarrow f(\psi_1, \psi_2, \psi_3|rest) &\propto \frac{1}{(2\pi)^{\frac{J^*M^*L}{2}} |\phi_0\boldsymbol{\Sigma}|^{\frac{1}{2}}} \exp \left\{ -\frac{1}{2} \boldsymbol{\theta}^T (\phi_0\boldsymbol{\Sigma})^{-1} \boldsymbol{\theta} \right\} \prod_{k=1}^3 \frac{\exp(\psi_k)}{\{1 + \exp(\psi_k)\}^2} \end{aligned}$$

#### 1.5 Extra

- $(\boldsymbol{\Sigma})^{-1} = (\boldsymbol{\Sigma}_1 \otimes \boldsymbol{\Sigma}_2 \otimes \boldsymbol{\Sigma}_3)^{-1} = \boldsymbol{\Sigma}_1^{-1} \otimes \boldsymbol{\Sigma}_2^{-1} \otimes \boldsymbol{\Sigma}_3^{-1}$
- $|\boldsymbol{\Sigma}| = |\boldsymbol{\Sigma}_1 \otimes \boldsymbol{\Sigma}_2 \otimes \boldsymbol{\Sigma}_3| = |\boldsymbol{\Sigma}_1|^{J^*M} |\boldsymbol{\Sigma}_2|^{L^*M} |\boldsymbol{\Sigma}_3|^{J^*L}$

## 2 Web Appendix B

The following code is useful for analyzing a single region of interest where the pollution exposure is treated as a fixed input.

```
#####  
#Needed Packages  
#####  
library(msm) #Sampling from the truncated normal distribution  
library(mnormt) #Sampling from the multivariate normal distribution  
#####  
#Stage 3 Health Model:  
#phi1: Uniform prior distribution  
#phi2: Uniform prior distribution  
#Non spatial; meant for a single region of interest  
#Needed: Y vector of binary responses  
# x design matrix of covariates of interest  
# z pollution exposure matrix  
# N value of sample size  
# M value for number of weeks being analyzed  
#####  
#Random seed  
set.seed(087632)  
  
#Number of samples from the posterior to take  
samples<-10000  
  
#Initializing the parameter vectors and matrices  
beta<-matrix(0,nrow=samples,ncol=ncol(x))  
theta<-matrix(0,nrow=samples,ncol=ncol(z))  
phi0<-rep(0,times=samples)  
phi1_trans<-rep(0,times=samples)  
phi2_trans<-rep(0,times=samples)  
neg_two_loglike<-rep(0,times=samples)  
  
#Prior information  
a_phi1<-0.00001 #Lower bound for the phi1 uniform prior  
b_phi1<-5 #Upper bound for the phi1 uniform prior  
a_phi2<-0.01 #Lower bound for the phi2 uniform prior  
b_phi2<-5 #Upper bound for the phi2 uniform prior  
sigma2_beta<-1000000000 #Prior variance for beta parameters  
  
#Initial values  
phi0[1]<-0.45  
phi1_trans[1]<-log((0.1-a_phi1)/(b_phi1-0.1)) #0n phi1_trans scale  
phi2_trans[1]<-log((2-a_phi2)/(b_phi2-2)) #0n phi2_trans scale
```

```

#Correlation creation function
corr_fun<-function(phi1_trans_val,phi2_trans_val){
#phi1 scale
phi1_val<-(b_phi1*exp(phi1_trans_val) + a_phi1)/(exp(phi1_trans_val) + 1)
#phi2 scale
phi2_val<-(b_phi2*exp(phi2_trans_val) + a_phi2)/(exp(phi2_trans_val) + 1)
#Defines the temporal part of the correlation matrix
times <- 1:M
rho <- exp(-phi1_val)
H <- abs(outer(times, times, "-"))
K <- rho^H
p <- nrow(K)
#Final matrix which describes the temporal correlation
K[cbind(1:p, 1:p)] <- K[cbind(1:p, 1:p)]
#Defines the cross pollutant correlation matrix
J<-matrix(c(1,exp(-phi2_val),exp(-phi2_val),1),nrow=2,ncol=2)
#Full correlation matrix
corr<-kronecker(J,K)
#Inverse of the correlation matrix
corr_inv<-kronecker(chol2inv(chol(J)),(chol2inv(chol(K))))
#Log of the determinant of the correlation matrix
logdeter<-nrow(J)*log(det(K)) + nrow(K)*log(det(J))
return(list(corr_inv=corr_inv,logdeter=logdeter))
}

#Log of the full conditional distribution of the
#phi1_trans and phi2_trans parameters
phis_trans_log_full_cond_fun<-function(phi1_trans_val,phi2_trans_val){
val<- -(1/2)*corr_info[[2]]
- (1/(2*phi0[i]))*t(theta[i,])%*%corr_info[[1]]%*%theta[i,]
+ phi1_trans_val + phi2_trans_val - 2*log(1+exp(phi1_trans_val))
- 2*log(1+exp(phi2_trans_val))
return(val)
}

#Needed in the sampling loop, but only need to be calculated once
xtx<-t(x)%*%x
xtz<-t(x)%*%z
ztz<-t(z)%*%z
ztx<-t(z)%*%x
var1<-chol2inv(chol(xtx + diag((1/sigma2_beta),nrow=nrow(xtx),ncol=ncol(xtx))))

#Keeping up with the Metropolis algorithm acceptance rates
acctot<-0

```

```

#Metropolis algorithm variances for phi1_trans and phi2_trans
mhvar_phi1<-.17
mhvar_phi2<-.71

#Initial setting for the correlation information
corr_info<-corr_fun(phi1_trans[1],phi2_trans[1])

#Main sampling loop
for(i in 2:samples){

  #Sampling W_i's from the full conditional truncated normal distribution
  #where the truncation is determined by Yi's
  w<-(((1-Y)*rtnorm(n=N,mean=x%%beta[(i-1),]+z%%theta[(i-1),],
    sd=1, lower=-Inf, upper=0))
    + ((Y)*rtnorm(n=N,mean=x%%beta[(i-1),]+z%%theta[(i-1),],
    sd=1, lower=0, upper=Inf)))

  #Sampling beta from the full conditional multivariate normal distribution
  beta[i,]<-rmnorm(n=1,mean=((var1)%%(t(x)%%w-(xtz%%theta[(i-1),]))), (var1))

  #Sampling theta from the full conditional multivariate normal distribution
  var2<-chol2inv(chol((ztz)+((1/phi0[i-1])*corr_info[[1]])))
  theta[i,]<-rmnorm(n=1,mean=((var2)%%(t(z)%%w-(ztz%%beta[i,]))), (var2))

  #Sampling phi0 from the full conditional inverse gamma distribution
  #This is for an invgamma(3,1) prior
  phi0[i]<-rgamma(n=1,shape=((2*M)/2)+3),
    rate=(((t(theta[i,])%%(corr_info[[1]])%%theta[i,])/2)+1))
  phi0[i]<-1/phi0[i]
  #####
  #Metropolis algorithm sampling for phi1_trans and phi2_trans
  #Keeping up with current correlation information
  corr_info_old<-corr_info
  #Updating the phi1_trans and phi2_trans parameters
  phi1_trans[i]<-phi1_trans[i-1]+rnorm(n=1,mean=0,sd=sqrt(mhvar_phi1))
  phi2_trans[i]<-phi2_trans[i-1]+rnorm(n=1,mean=0,sd=sqrt(mhvar_phi2))
  #Function call for previous values
  second<-phis_trans_log_full_cond_fun(phi1_trans[i-1],phi2_trans[i-1])
  #New correlation information based on proposed phi_trans values
  corr_info<-corr_fun(phi1_trans[i],phi2_trans[i])
  #Function call for proposed values
  first<-phis_trans_log_full_cond_fun(phi1_trans[i],phi2_trans[i])
  #Determining if we should accept the proposed values
  Ratio<-exp(first-second)

```

```

if(Ratio>=1){
  acc<-1
}
if(Ratio<1){
  if(Ratio<runif(n=1,min=0,max=1)){
    phi1_trans[i]<-phi1_trans[i-1]
    phi2_trans[i]<-phi2_trans[i-1]
    corr_info<-corr_info_old
    acc<-0
  }
  else{
    acc<-1
  }
}
#New acceptance total
acctot<-acctot+acc
#####
#Model diagnostics analysis
probs<-pnorm((x%*%beta[i,] + z%*%theta[i,]),mean=0,sd=1,lower.tail=TRUE)
neg_two_loglike[i]<- -2*sum(log((probs^Y)*((1-probs)^(1-Y))))

#####
#Prints the acceptance rate for the Metropolis algorithm sampling
print(acctot/i)
#Prints other useful information
print(c(i/samples,"2 Uniform Priors, No Space"))
}

```



### 3 Web Table 1

Table 1: *Posterior summaries for the covariance parameters from Model 1A. The average MC error for the means is 0.02.*

| Parameter    | Prior               | Starting Value | Mean   | Percentiles |         |         |
|--------------|---------------------|----------------|--------|-------------|---------|---------|
|              |                     |                |        | 0.025       | 0.50    | 0.975   |
| $\phi_0$     | Inverse gamma(3, 1) | 0.45           | 0.25   | 0.10        | 0.21    | 0.59    |
| $\phi_2$     | Uniform(0.00001, 5) | 0.10           | 0.0001 | 0.00002     | 0.00008 | 0.00030 |
| $\phi_3$     | Uniform(0.01, 5)    | 2.00           | 2.95   | 0.80        | 3.00    | 4.83    |
| $p_D = 42.4$ | DIC= 17246.3        |                |        |             |         |         |

### 4 Web Table 2

Table 2: *Posterior summaries for the covariance parameters from Model 1B. The average MC error for the means is 0.03.*

| Parameter    | Prior               | Starting Value | Mean    | Percentiles |         |         |
|--------------|---------------------|----------------|---------|-------------|---------|---------|
|              |                     |                |         | 0.025       | 0.50    | 0.975   |
| $\phi_0$     | Inverse gamma(3, 1) | 0.45           | 0.25    | 0.09        | 0.21    | 0.62    |
| $\phi_2$     | Gamma(1, 1)         | 0.10           | 0.00011 | 0.00002     | 0.00008 | 0.00039 |
| $\phi_3$     | Gamma(1, 2)         | 2.00           | 2.98    | 0.52        | 2.41    | 8.82    |
| $p_D = 43.0$ | DIC= 17247.8        |                |         |             |         |         |

### 5 Web Table 3

Table 3: *Posterior summaries for the covariance parameters from Model 1C. The average MC error for the means is 0.03.*

| Parameter    | Prior               | Starting Value | Mean    | Percentiles |         |         |
|--------------|---------------------|----------------|---------|-------------|---------|---------|
|              |                     |                |         | 0.025       | 0.50    | 0.975   |
| $\phi_0$     | Inverse gamma(3, 1) | 0.45           | 0.25    | 0.10        | 0.21    | 0.63    |
| $\phi_2$     | Uniform(0.00001, 5) | 0.10           | 0.00011 | 0.00002     | 0.00008 | 0.00035 |
| $\phi_3$     | Gamma(1, 2)         | 2.00           | 3.01    | 0.42        | 2.43    | 8.79    |
| $p_D = 42.9$ | DIC= 17247.1        |                |         |             |         |         |

## 6 Web Table 4

Table 4: *Posterior summaries for the covariance parameters from Model 1D. The average MC error for the means is 0.04.*

| Parameter    | Prior               | Starting Value | Mean    | Percentiles |         |         |
|--------------|---------------------|----------------|---------|-------------|---------|---------|
|              |                     |                |         | 0.025       | 0.50    | 0.975   |
| $\phi_0$     | Uniform(0.01, 10)   | 0.45           | 0.07    | 0.01        | 0.02    | 0.62    |
| $\phi_2$     | Uniform(0.00001, 5) | 0.10           | 0.00113 | 0.00003     | 0.00083 | 0.00401 |
| $\phi_3$     | Gamma(1, 2)         | 2.00           | 3.05    | 0.55        | 2.52    | 8.68    |
| $p_D = 43.2$ | DIC= 17247.1        |                |         |             |         |         |

## 7 Web Table 5

Table 5: *Posterior summaries for the covariance parameters from Model 4. The average MC error for the means is 0.07.*

| Parameter | Prior               | Starting Value | Mean    | Percentiles |         |         |
|-----------|---------------------|----------------|---------|-------------|---------|---------|
|           |                     |                |         | 0.025       | 0.50    | 0.975   |
| $\phi_0$  | Inverse gamma(3, 1) | 0.45           | 0.21    | 0.09        | 0.19    | 0.47    |
| $\phi_2$  | Uniform(0.00001, 5) | 0.10           | 0.00003 | 0.00001     | 0.00002 | 0.00009 |
| $\phi_3$  | Uniform(0.01, 5)    | 2.00           | 1.52    | 0.02        | 0.88    | 4.77    |

## 8 Web Table 6

Table 6: *Posterior summaries for the covariance parameters from Model 5. The average MC error for the means is 0.07.*

| Parameter | Prior               | Starting Value | Mean    | Percentiles |         |         |
|-----------|---------------------|----------------|---------|-------------|---------|---------|
|           |                     |                |         | 0.025       | 0.50    | 0.975   |
| $\phi_0$  | Inverse gamma(3, 1) | 0.45           | 0.07    | 0.04        | 0.06    | 0.10    |
| $\phi_2$  | Uniform(0.00001, 5) | 0.0001         | 0.00014 | 0.00005     | 0.00013 | 0.00030 |
| $\phi_3$  | Uniform(0.01, 5)    | 2.00           | 2.23    | 0.01        | 2.32    | 4.83    |

## 9 Web Table 7

Table 7: *Posterior summaries for the covariance parameters from Model 6. The average MC error for the means is 0.04.*

| Parameter | Prior                  | Starting Value | Mean     | Percentiles |          |          |
|-----------|------------------------|----------------|----------|-------------|----------|----------|
|           |                        |                |          | 0.025       | 0.50     | 0.975    |
| $\phi_0$  | Inverse gamma(3, 1)    | 0.45           | 0.12     | 0.07        | 0.12     | 0.21     |
| $\phi_1$  | Uniform(0.00001, 0.03) | 0.0001         | 0.000014 | 0.000010    | 0.000014 | 0.000021 |
| $\phi_2$  | Uniform(0.00001, 5)    | 0.0001         | 0.00037  | 0.00013     | 0.00032  | 0.00084  |
| $\phi_3$  | Uniform(0.01, 5)       | 2.00           | 2.86     | 0.59        | 2.90     | 4.90     |

## 10 Web Table 8

Table 8: *Posterior summaries (means and 95% credible intervals) for the spatial processes used for each weather variable in Stage 1. The trend of each variable's spatial/temporal surface is modeled using latitude, longitude, month (categorical), and date (linear) predictors. Higher order interactions are also included.*

| Variable                                                                                                                           | Spatial Covar. | $\sigma_w^2$            | $\phi$                        | Nugget                     |
|------------------------------------------------------------------------------------------------------------------------------------|----------------|-------------------------|-------------------------------|----------------------------|
| Avg. Temp.                                                                                                                         | Spherical      | 0.747<br>(0.716, 0.777) | 0.00048<br>(0.00046, 0.00051) | 45.167<br>(43.102, 47.182) |
| Avg. Dewp.                                                                                                                         | Spherical      | 0.984<br>(0.950, 1.019) | 0.00049<br>(0.00046, 0.00051) | 60.732<br>(58.051, 64.027) |
| Avg. Wdsp.<br>(Square Root Scale)                                                                                                  | Exponential    | 0.043<br>(0.041, 0.044) | 0.00250<br>(0.00240, 0.00262) | 0.268<br>(0.259, 0.277)    |
| Avg. Cloud Cover<br>(Probit Scale)                                                                                                 | Exponential    | 2.033<br>(1.904, 2.173) | 0.00189<br>(0.00170, 0.00209) | NA<br>NA                   |
| Spherical: $\sigma_w^2 \left\{ 1 - 1.5\phi \ s - s'\  + 0.5(\phi \ s - s'\ )^3 \right\} I\left(\ s - s'\  < \frac{1}{\phi}\right)$ |                |                         |                               |                            |

## 11 Web Table 9

Table 9: *Stage 2 ozone (square root scale) model results.*

| Covariate             | Mean     | SD      | Percentiles |          |          |
|-----------------------|----------|---------|-------------|----------|----------|
|                       |          |         | 0.025       | 0.50     | 0.975    |
| Intercept             | -1.14507 | 0.22552 | -1.58726    | -1.14571 | -0.69999 |
| Latitude              | 0.01555  | 0.00642 | 0.00307     | 0.01548  | 0.02809  |
| Longitude             | -0.02106 | 0.00398 | -0.02905    | -0.02105 | -0.01324 |
| Lat.*Lat.             | -0.00025 | 0.00005 | -0.00035    | -0.00025 | -0.00016 |
| Long.*Long.           | -0.00012 | 0.00002 | -0.00016    | -0.00012 | -0.00007 |
| Lat.*Long.            | -0.00003 | 0.00006 | -0.00014    | -0.00003 | 0.00008  |
| <b>Month</b>          |          |         |             |          |          |
| February vs. January  | 0.01822  | 0.00235 | 0.01369     | 0.01822  | 0.02277  |
| March vs. January     | 0.02054  | 0.00232 | 0.01602     | 0.02056  | 0.02517  |
| April vs. January     | 0.02206  | 0.00250 | 0.01719     | 0.02205  | 0.02686  |
| May vs. January       | 0.01528  | 0.00262 | 0.01003     | 0.01528  | 0.02034  |
| June vs. January      | 0.00374  | 0.00279 | -0.00174    | 0.00374  | 0.00916  |
| July vs. January      | -0.00222 | 0.00284 | -0.00781    | -0.00218 | 0.00336  |
| August vs. January    | 0.00927  | 0.00286 | 0.00377     | 0.00930  | 0.01490  |
| September vs. January | 0.01924  | 0.00273 | 0.01395     | 0.01924  | 0.02460  |
| October vs. January   | 0.00068  | 0.00251 | -0.00420    | 0.00067  | 0.00566  |
| November vs. January  | -0.00364 | 0.00232 | -0.00819    | -0.00364 | 0.00089  |
| December vs. January  | 0.00009  | 0.00229 | -0.00442    | 0.00010  | 0.00458  |
| Avg. Temp.            | 0.00159  | 0.00005 | 0.00149     | 0.00159  | 0.00170  |
| Avg. Dewp.            | -0.00088 | 0.00004 | -0.00096    | -0.00088 | -0.00078 |
| Avg. Wdsp.            | -0.00359 | 0.00055 | -0.00472    | -0.00354 | -0.00263 |
| Avg. Cloud Cover      | -0.00651 | 0.00038 | -0.00729    | -0.00647 | -0.00580 |
| $\sigma_w^2$          | 0.00011  | 0.00000 | 0.00011     | 0.00011  | 0.00011  |
| $\phi$                | 0.00275  | 0.00007 | 0.00263     | 0.00275  | 0.00289  |
| Nugget                | 0.00077  | 0.00002 | 0.00073     | 0.00077  | 0.00080  |

## 12 Web Table 10

Table 10: *Stage 2 PM<sub>2.5</sub> (cubed root scale) model results.*

| Covariate             | Mean    | SD      | Percentiles |         |         |
|-----------------------|---------|---------|-------------|---------|---------|
|                       |         |         | 0.025       | 0.50    | 0.975   |
| Intercept             | 25.9136 | 3.6334  | 18.7009     | 25.9556 | 33.0324 |
| Latitude              | -0.0784 | 0.0747  | -0.2219     | -0.0784 | 0.0712  |
| Longitude             | 0.4549  | 0.0640  | 0.3262      | 0.4556  | 0.5813  |
| Lat.*Lat.             | 0.0022  | 0.0007  | 0.0009      | 0.0022  | 0.0034  |
| Long.*Long.           | 0.0023  | 0.0003  | 0.0016      | 0.0023  | 0.0029  |
| Lat.*Long.            | 0.0003  | 0.0007  | -0.0011     | 0.0003  | 0.0016  |
| <b>Month</b>          |         |         |             |         |         |
| February vs. January  | -0.0515 | 0.0271  | -0.1032     | -0.0515 | 0.0022  |
| March vs. January     | -0.0915 | 0.0271  | -0.1443     | -0.0917 | -0.0378 |
| April vs. January     | -0.1139 | 0.0301  | -0.1730     | -0.1138 | -0.0548 |
| May vs. January       | -0.0954 | 0.0329  | -0.1614     | -0.0952 | -0.0312 |
| June vs. January      | -0.3712 | 0.0350  | -0.4396     | -0.3716 | -0.3011 |
| July vs. January      | -0.3501 | 0.0360  | -0.4213     | -0.3493 | -0.2800 |
| August vs. January    | -0.3363 | 0.0361  | -0.4061     | -0.3362 | -0.2650 |
| September vs. January | -0.2523 | 0.0338  | -0.3187     | -0.2519 | -0.1853 |
| October vs. January   | -0.3447 | 0.0313  | -0.4058     | -0.3443 | -0.2837 |
| November vs. January  | -0.2191 | 0.0277  | -0.2733     | -0.2192 | -0.1648 |
| December vs. January  | -0.0932 | 0.0272  | -0.1459     | -0.0935 | -0.0398 |
| Avg. Temp.            | 0.0125  | 0.0008  | 0.0109      | 0.0125  | 0.0142  |
| Avg. Dewp.            | 0.0011  | 0.0008  | -0.0004     | 0.0011  | 0.0026  |
| Avg. Wdsp.            | -0.1914 | 0.0086  | -0.2065     | -0.1920 | -0.1736 |
| Avg. Cloud Cover      | 0.0152  | 0.0038  | 0.0097      | 0.0143  | 0.0230  |
| $\sigma_w^2$          | 0.01118 | 0.00052 | 0.01018     | 0.01119 | 0.01217 |
| $\phi_1$              | 0.00002 | 0.00001 | 0.00001     | 0.00002 | 0.00003 |
| $\phi_2$              | 0.02880 | 0.00244 | 0.02452     | 0.02871 | 0.03370 |
| $p_1$                 | 1.89607 | 0.06048 | 1.80993     | 1.88417 | 2.01437 |
| $p_2$                 | 0.53332 | 0.01534 | 0.50355     | 0.53285 | 0.56239 |
| Nugget                | 0.10891 | 0.00232 | 0.10468     | 0.10886 | 0.11373 |

### 13 Web Table 11

Table 11: *Included covariate results for Model 2. The (\*\*) items have 95% credible intervals which do not include zero.*

| <b>Covariate</b>                     | <b>Mean</b> | <b>SD</b> | <b>Percentiles</b> |             |              |
|--------------------------------------|-------------|-----------|--------------------|-------------|--------------|
|                                      |             |           | <b>0.025</b>       | <b>0.50</b> | <b>0.975</b> |
| <b>Intercept**</b>                   | -1.406      | 0.280     | -1.967             | -1.402      | -0.871       |
| <b>Maternal Race</b>                 |             |           |                    |             |              |
| Black vs. White**                    | 0.155       | 0.068     | 0.023              | 0.153       | 0.287        |
| Hispanic vs. White                   | -0.042      | 0.039     | -0.119             | -0.042      | 0.034        |
| Other vs. White                      | 0.089       | 0.072     | -0.051             | 0.089       | 0.230        |
| <b>Paternal Race</b>                 |             |           |                    |             |              |
| Black vs. White                      | 0.008       | 0.067     | -0.123             | 0.008       | 0.139        |
| Hispanic vs. White                   | -0.003      | 0.040     | -0.084             | -0.003      | 0.075        |
| Other vs. White **                   | -0.190      | 0.077     | -0.346             | -0.190      | -0.042       |
| <b>Maternal Age Group</b>            |             |           |                    |             |              |
| 20 – 24 vs. 10 – 19**                | -0.070      | 0.031     | -0.130             | -0.069      | -0.010       |
| 25 – 29 vs. 10 – 19                  | -0.020      | 0.036     | -0.090             | -0.021      | 0.051        |
| 30 – 34 vs. 10 – 19                  | 0.046       | 0.039     | -0.032             | 0.046       | 0.123        |
| 35 – 39 vs. 10 – 19**                | 0.128       | 0.051     | 0.027              | 0.129       | 0.228        |
| ≥ 40 vs. 10 – 19**                   | 0.313       | 0.089     | 0.138              | 0.313       | 0.489        |
| <b>Paternal Age ≥ 50 vs. &lt; 50</b> | -0.037      | 0.127     | -0.292             | -0.035      | 0.206        |
| <b>Maternal Education</b>            |             |           |                    |             |              |
| Basis Spline 1                       | -0.414      | 0.348     | -1.079             | -0.423      | 0.276        |
| Basis Spline 2                       | 0.173       | 0.176     | -0.164             | 0.172       | 0.531        |
| Basis Spline 3                       | 0.010       | 0.204     | -0.377             | 0.007       | 0.417        |
| <b>Paternal Education</b>            |             |           |                    |             |              |
| Basis Spline 1                       | 0.170       | 0.304     | -0.407             | 0.165       | 0.783        |
| Basis Spline 2                       | -0.003      | 0.147     | -0.279             | -0.008      | 0.289        |
| Basis Spline 3                       | -0.053      | 0.172     | -0.381             | -0.058      | 0.296        |
| <b>Female vs. Male Baby**</b>        | -0.069      | 0.021     | -0.111             | -0.069      | -0.029       |

## 14 Web Table 12

Table 12: *Included covariate results for Model 3. The (\*\*) items have 95% credible intervals which do not include zero.*

| <b>Covariate</b>                     | <b>Mean</b> | <b>SD</b> | <b>Percentiles</b> |             |              |
|--------------------------------------|-------------|-----------|--------------------|-------------|--------------|
|                                      |             |           | <b>0.025</b>       | <b>0.50</b> | <b>0.975</b> |
| <b>Intercept**</b>                   | -1.497      | 0.286     | -2.067             | -1.494      | -0.946       |
| <b>Maternal Race</b>                 |             |           |                    |             |              |
| Black vs. White**                    | 0.147       | 0.068     | 0.014              | 0.147       | 0.280        |
| Hispanic vs. White                   | -0.046      | 0.038     | -0.120             | -0.046      | 0.030        |
| Other vs. White                      | 0.084       | 0.070     | -0.054             | 0.083       | 0.220        |
| <b>Paternal Race</b>                 |             |           |                    |             |              |
| Black vs. White                      | 0.011       | 0.067     | -0.119             | 0.011       | 0.147        |
| Hispanic vs. White                   | -0.005      | 0.039     | -0.081             | -0.005      | 0.070        |
| Other vs. White **                   | -0.190      | 0.074     | -0.333             | -0.190      | -0.045       |
| <b>Maternal Age Group</b>            |             |           |                    |             |              |
| 20 – 24 vs. 10 – 19**                | -0.067      | 0.032     | -0.129             | -0.068      | -0.003       |
| 25 – 29 vs. 10 – 19                  | -0.020      | 0.036     | -0.089             | -0.020      | 0.050        |
| 30 – 34 vs. 10 – 19                  | 0.044       | 0.039     | -0.033             | 0.045       | 0.121        |
| 35 – 39 vs. 10 – 19**                | 0.132       | 0.051     | 0.030              | 0.132       | 0.229        |
| ≥ 40 vs. 10 – 19**                   | 0.310       | 0.091     | 0.132              | 0.310       | 0.490        |
| <b>Paternal Age ≥ 50 vs. &lt; 50</b> | -0.049      | 0.129     | -0.311             | -0.047      | 0.198        |
| <b>Maternal Education</b>            |             |           |                    |             |              |
| Basis Spline 1                       | -0.399      | 0.360     | -1.089             | -0.407      | 0.327        |
| Basis Spline 2                       | 0.187       | 0.177     | -0.158             | 0.181       | 0.549        |
| Basis Spline 3                       | 0.021       | 0.210     | -0.387             | 0.015       | 0.450        |
| <b>Paternal Education</b>            |             |           |                    |             |              |
| Basis Spline 1                       | 0.137       | 0.308     | -0.447             | 0.134       | 0.756        |
| Basis Spline 2                       | -0.016      | 0.150     | -0.302             | -0.018      | 0.281        |
| Basis Spline 3                       | -0.069      | 0.178     | -0.413             | -0.073      | 0.284        |
| <b>Female vs. Male Baby**</b>        | -0.070      | 0.021     | -0.112             | -0.070      | -0.030       |

## 15 Web Table 13

Table 13: *Included covariate results for Model 4. The (\*\*) items have 95% credible intervals which do not include zero.*

| <b>Covariate</b>                     | <b>Mean</b> | <b>SD</b> | <b>Percentiles</b> |             |              |
|--------------------------------------|-------------|-----------|--------------------|-------------|--------------|
|                                      |             |           | <b>0.025</b>       | <b>0.50</b> | <b>0.975</b> |
| <b>Intercept**</b>                   | -1.614      | 0.281     | -2.158             | -1.616      | -1.062       |
| <b>Maternal Race</b>                 |             |           |                    |             |              |
| Black vs. White**                    | 0.171       | 0.067     | 0.041              | 0.170       | 0.306        |
| Hispanic vs. White                   | -0.036      | 0.038     | -0.111             | -0.037      | 0.038        |
| Other vs. White                      | 0.101       | 0.071     | -0.041             | 0.101       | 0.239        |
| <b>Paternal Race</b>                 |             |           |                    |             |              |
| Black vs. White                      | 0.003       | 0.066     | -0.134             | 0.003       | 0.130        |
| Hispanic vs. White                   | 0.003       | 0.039     | -0.075             | 0.003       | 0.080        |
| Other vs. White **                   | -0.192      | 0.076     | -0.339             | -0.191      | -0.041       |
| <b>Maternal Age Group</b>            |             |           |                    |             |              |
| 20 – 24 vs. 10 – 19**                | -0.069      | 0.031     | -0.129             | -0.069      | -0.007       |
| 25 – 29 vs. 10 – 19                  | -0.025      | 0.036     | -0.095             | -0.025      | 0.043        |
| 30 – 34 vs. 10 – 19                  | 0.049       | 0.040     | -0.028             | 0.049       | 0.128        |
| 35 – 39 vs. 10 – 19**                | 0.133       | 0.051     | 0.032              | 0.133       | 0.234        |
| ≥ 40 vs. 10 – 19**                   | 0.318       | 0.088     | 0.145              | 0.318       | 0.490        |
| <b>Paternal Age ≥ 50 vs. &lt; 50</b> | -0.049      | 0.128     | -0.307             | -0.046      | 0.193        |
| <b>Maternal Education</b>            |             |           |                    |             |              |
| Basis Spline 1                       | -0.380      | 0.349     | -1.070             | -0.381      | 0.306        |
| Basis Spline 2                       | 0.178       | 0.174     | -0.160             | 0.178       | 0.526        |
| Basis Spline 3                       | 0.030       | 0.204     | -0.362             | 0.029       | 0.433        |
| <b>Paternal Education</b>            |             |           |                    |             |              |
| Basis Spline 1                       | 0.174       | 0.301     | -0.415             | 0.170       | 0.779        |
| Basis Spline 2                       | -0.012      | 0.150     | -0.304             | -0.014      | 0.285        |
| Basis Spline 3                       | -0.059      | 0.172     | -0.385             | -0.063      | 0.285        |
| <b>Female vs. Male Baby**</b>        | -0.068      | 0.020     | -0.107             | -0.068      | -0.028       |



## 16 Web Table 14

Table 14: *Included covariate results for Model 5. The (\*\*) items have 95% credible intervals which do not include zero.*

| <b>Covariate</b>                     | <b>Mean</b> | <b>SD</b> | <b>Percentiles</b> |             |              |
|--------------------------------------|-------------|-----------|--------------------|-------------|--------------|
|                                      |             |           | <b>0.025</b>       | <b>0.50</b> | <b>0.975</b> |
| <b>Intercept**</b>                   | -1.431      | 0.259     | -1.943             | -1.427      | -0.927       |
| <b>Maternal Race</b>                 |             |           |                    |             |              |
| Black vs. White**                    | 0.193       | 0.057     | 0.082              | 0.194       | 0.305        |
| Hispanic vs. White                   | -0.033      | 0.032     | -0.095             | -0.033      | 0.029        |
| Other vs. White                      | 0.051       | 0.060     | -0.068             | 0.050       | 0.171        |
| <b>Paternal Race</b>                 |             |           |                    |             |              |
| Black vs. White                      | -0.012      | 0.056     | -0.121             | -0.012      | 0.097        |
| Hispanic vs. White                   | -0.010      | 0.033     | -0.074             | -0.010      | 0.054        |
| Other vs. White                      | -0.122      | 0.064     | -0.245             | -0.123      | 0.003        |
| <b>Maternal Age Group</b>            |             |           |                    |             |              |
| 20 – 24 vs. 10 – 19**                | -0.083      | 0.028     | -0.140             | -0.083      | -0.029       |
| 25 – 29 vs. 10 – 19                  | -0.015      | 0.031     | -0.077             | -0.015      | 0.047        |
| 30 – 34 vs. 10 – 19                  | 0.047       | 0.034     | -0.021             | 0.047       | 0.114        |
| 35 – 39 vs. 10 – 19**                | 0.139       | 0.044     | 0.053              | 0.139       | 0.225        |
| ≥ 40 vs. 10 – 19**                   | 0.270       | 0.077     | 0.118              | 0.270       | 0.417        |
| <b>Paternal Age ≥ 50 vs. &lt; 50</b> | -0.065      | 0.110     | -0.279             | -0.063      | 0.144        |
| <b>Maternal Education</b>            |             |           |                    |             |              |
| Basis Spline 1                       | -0.436      | 0.323     | -1.055             | -0.437      | 0.181        |
| Basis Spline 2                       | 0.185       | 0.169     | -0.139             | 0.184       | 0.518        |
| Basis Spline 3                       | -0.005      | 0.192     | -0.377             | -0.006      | 0.371        |
| <b>Paternal Education</b>            |             |           |                    |             |              |
| Basis Spline 1                       | 0.211       | 0.277     | -0.320             | 0.211       | 0.756        |
| Basis Spline 2                       | 0.070       | 0.134     | -0.189             | 0.069       | 0.326        |
| Basis Spline 3                       | -0.010      | 0.159     | -0.316             | -0.010      | 0.306        |
| <b>Female vs. Male Baby**</b>        | -0.068      | 0.018     | -0.104             | -0.068      | -0.033       |

## 17 Web Table 15

Table 15: *Included covariate results for Model 6. The (\*\*) items have 95% credible intervals which do not include zero.*

| <b>Covariate</b>                     | <b>Mean</b> | <b>SD</b> | <b>Percentiles</b> |             |              |
|--------------------------------------|-------------|-----------|--------------------|-------------|--------------|
|                                      |             |           | <b>0.025</b>       | <b>0.50</b> | <b>0.975</b> |
| <b>Intercept**</b>                   | -1.460      | 0.254     | -1.957             | -1.458      | -0.979       |
| <b>Maternal Race</b>                 |             |           |                    |             |              |
| Black vs. White**                    | 0.193       | 0.056     | 0.084              | 0.192       | 0.307        |
| Hispanic vs. White                   | -0.030      | 0.032     | -0.091             | -0.030      | 0.033        |
| Other vs. White                      | 0.053       | 0.059     | -0.064             | 0.053       | 0.168        |
| <b>Paternal Race</b>                 |             |           |                    |             |              |
| Black vs. White                      | -0.013      | 0.055     | -0.121             | -0.013      | 0.096        |
| Hispanic vs. White                   | -0.015      | 0.032     | -0.077             | -0.014      | 0.048        |
| Other vs. White **                   | -0.124      | 0.060     | -0.243             | -0.125      | -0.007       |
| <b>Maternal Age Group</b>            |             |           |                    |             |              |
| 20 – 24 vs. 10 – 19**                | -0.082      | 0.029     | -0.138             | -0.083      | -0.027       |
| 25 – 29 vs. 10 – 19                  | -0.016      | 0.032     | -0.078             | -0.016      | 0.047        |
| 30 – 34 vs. 10 – 19                  | 0.047       | 0.035     | -0.022             | 0.047       | 0.117        |
| 35 – 39 vs. 10 – 19**                | 0.141       | 0.043     | 0.057              | 0.140       | 0.224        |
| ≥ 40 vs. 10 – 19**                   | 0.267       | 0.079     | 0.113              | 0.267       | 0.421        |
| <b>Paternal Age ≥ 50 vs. &lt; 50</b> | -0.076      | 0.110     | -0.294             | -0.075      | 0.134        |
| <b>Maternal Education</b>            |             |           |                    |             |              |
| Basis Spline 1                       | -0.428      | 0.329     | -1.046             | -0.437      | 0.236        |
| Basis Spline 2                       | 0.183       | 0.165     | -0.139             | 0.182       | 0.515        |
| Basis Spline 3                       | -0.006      | 0.195     | -0.369             | -0.009      | 0.380        |
| <b>Paternal Education</b>            |             |           |                    |             |              |
| Basis Spline 1                       | 0.200       | 0.289     | -0.355             | 0.194       | 0.771        |
| Basis Spline 2                       | 0.072       | 0.137     | -0.186             | 0.070       | 0.345        |
| Basis Spline 3                       | -0.013      | 0.165     | -0.329             | -0.016      | 0.314        |
| <b>Female vs. Male Baby**</b>        | -0.066      | 0.018     | -0.103             | -0.066      | -0.031       |

## 18 Web Figure 1

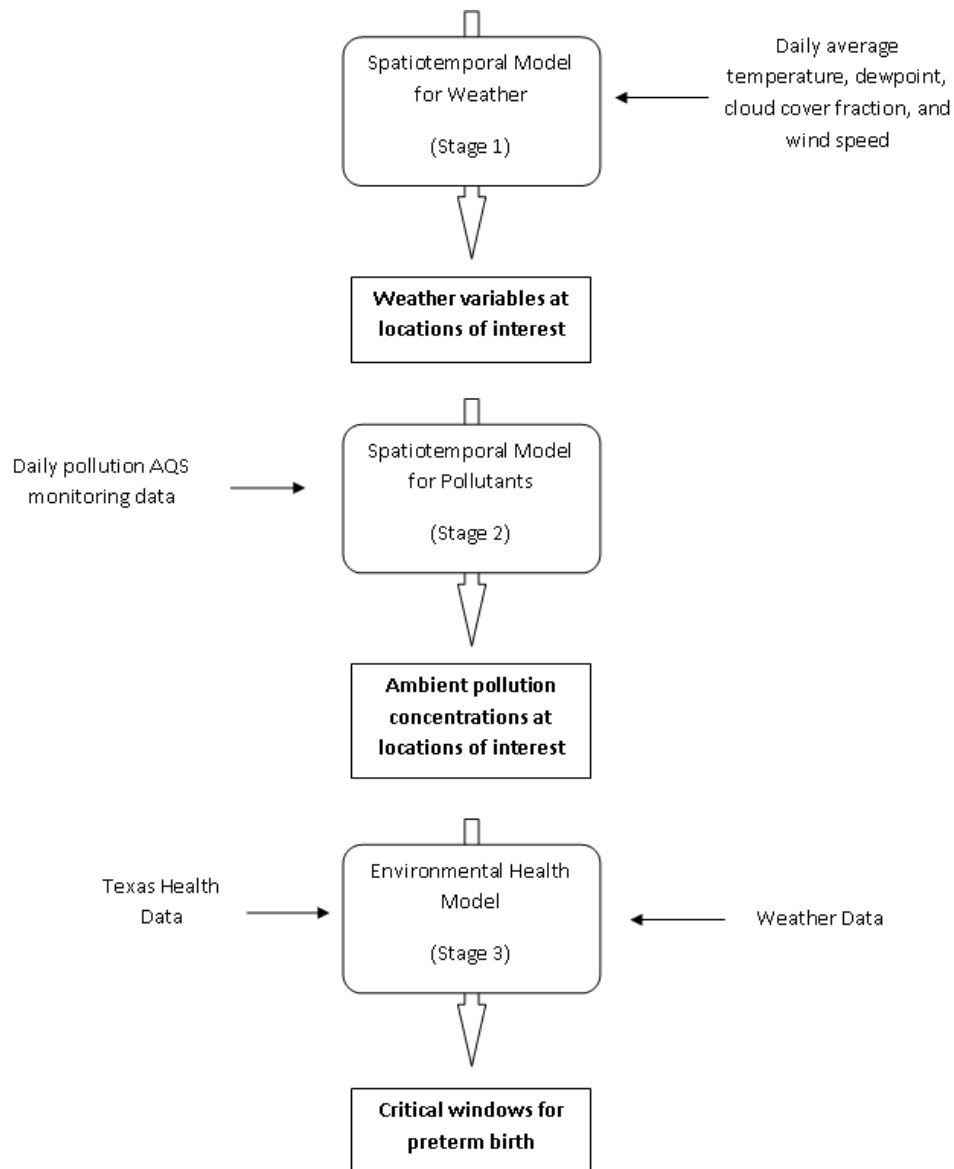

Figure 1: Large scale diagram describing the general setup of the modeling framework.



## 20 Web Figure 3

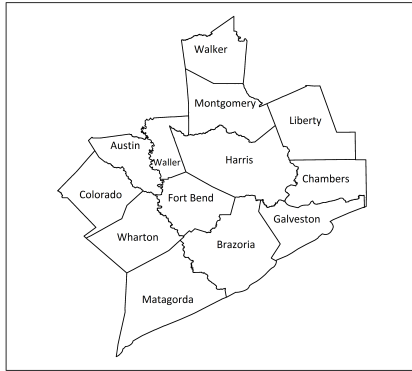

(a) Health Region Six.

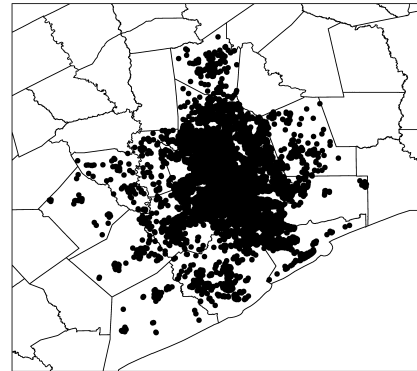

(b) Residence at Delivery.

Figure 3: Texas Department of State Health Services health service region six map (left) and plot of the residence at delivery (right) for all women included in analysis, 2002-2004.

## 21 Web Figure 4

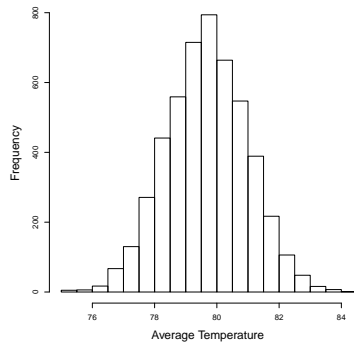

(a) PPD Histogram.

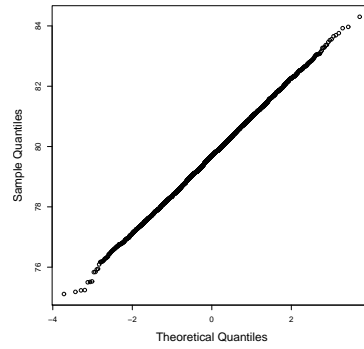

(b) Normal Q-Q Plot.

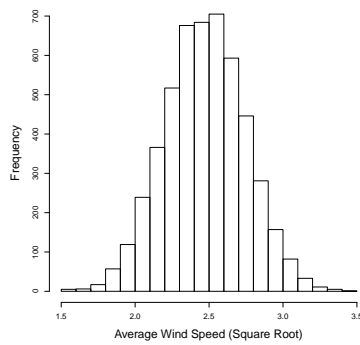

(c) PPD Histogram.

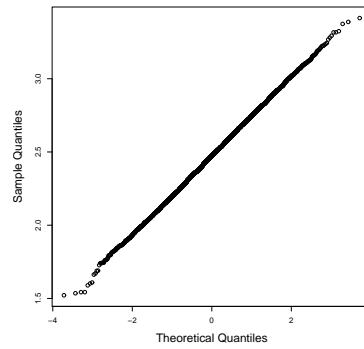

(d) Normal Q-Q Plot.

Figure 4: Histograms and normal quantile-quantile plots of ppd samples from a randomly selected location/date in the analysis domain for the daily average temperature (top row) and daily average windspeed (square root scale) (bottom row) climatic variables.

## 22 Web Figure 5

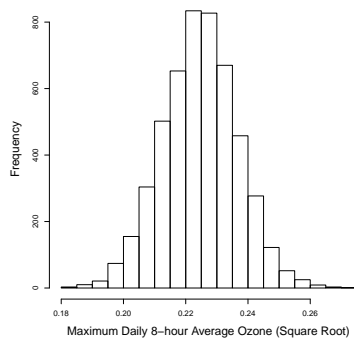

(a) PPD Histogram.

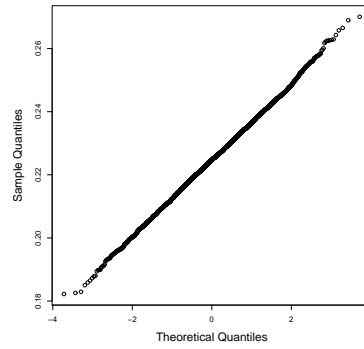

(b) Normal Q-Q Plot.

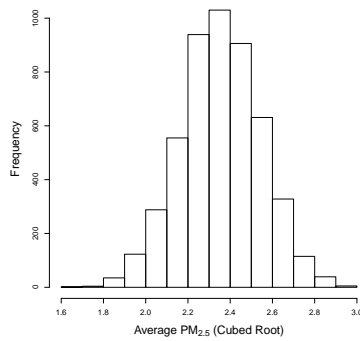

(c) PPD Histogram.

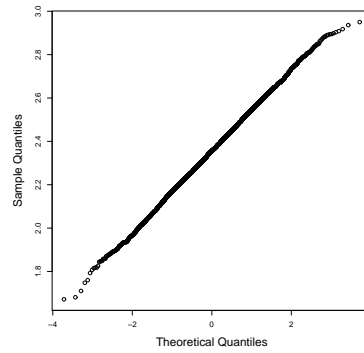

(d) QQPlot.

Figure 5: Histograms and normal quantile-quantile plots of ppd samples from a randomly selected location/date in the analysis domain for the maximum daily 8-hour average ozone (square root scale) (top row) and daily average PM<sub>2.5</sub> (cubed root scale) (bottom row) pollution variables.

## 23 Web Figure 6

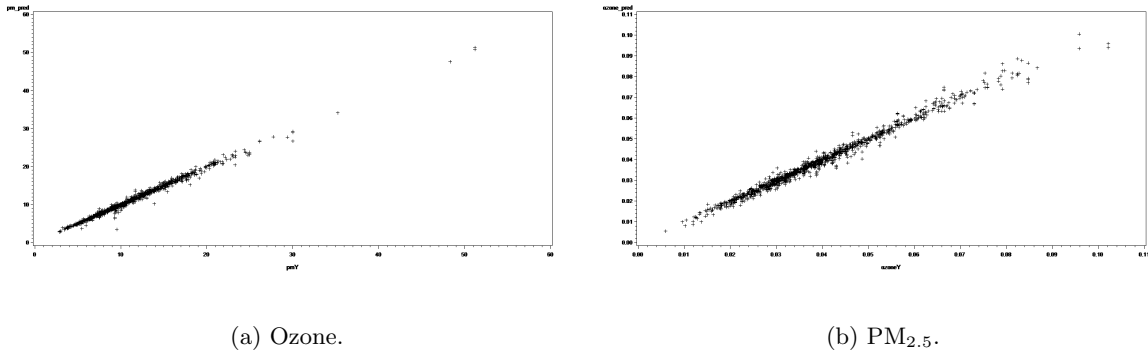

Figure 6: Plot of  $\tilde{Z}(s, t)$  vs.  $\tilde{Z}\{A(s), t\}$  for a randomly selected grid cell in Harris County, Texas.

## 24 Web Figure 7

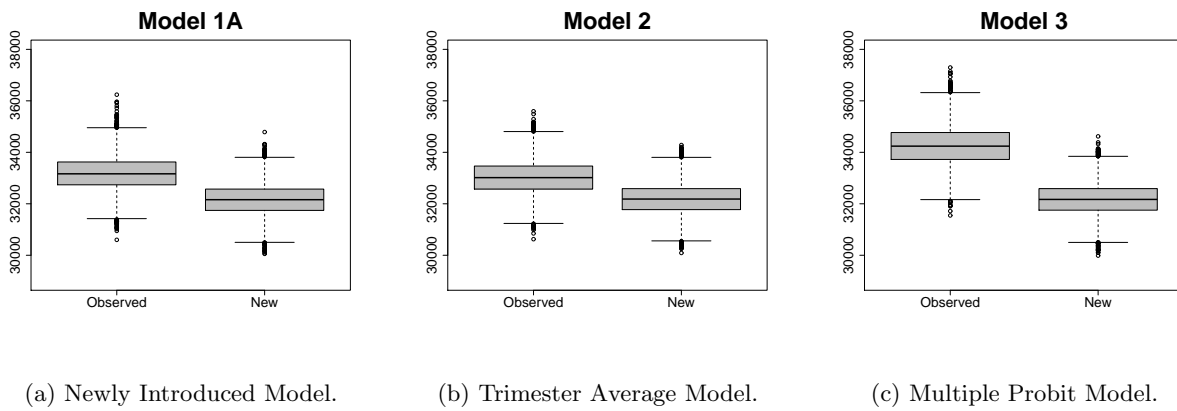

Figure 7: Boxplots of the total Pearson discrepancy measure sample from the observed data distribution (left) and the posterior predictive distribution (right) for Models 1A, 2, and 3.



## 25 Web Figure 8

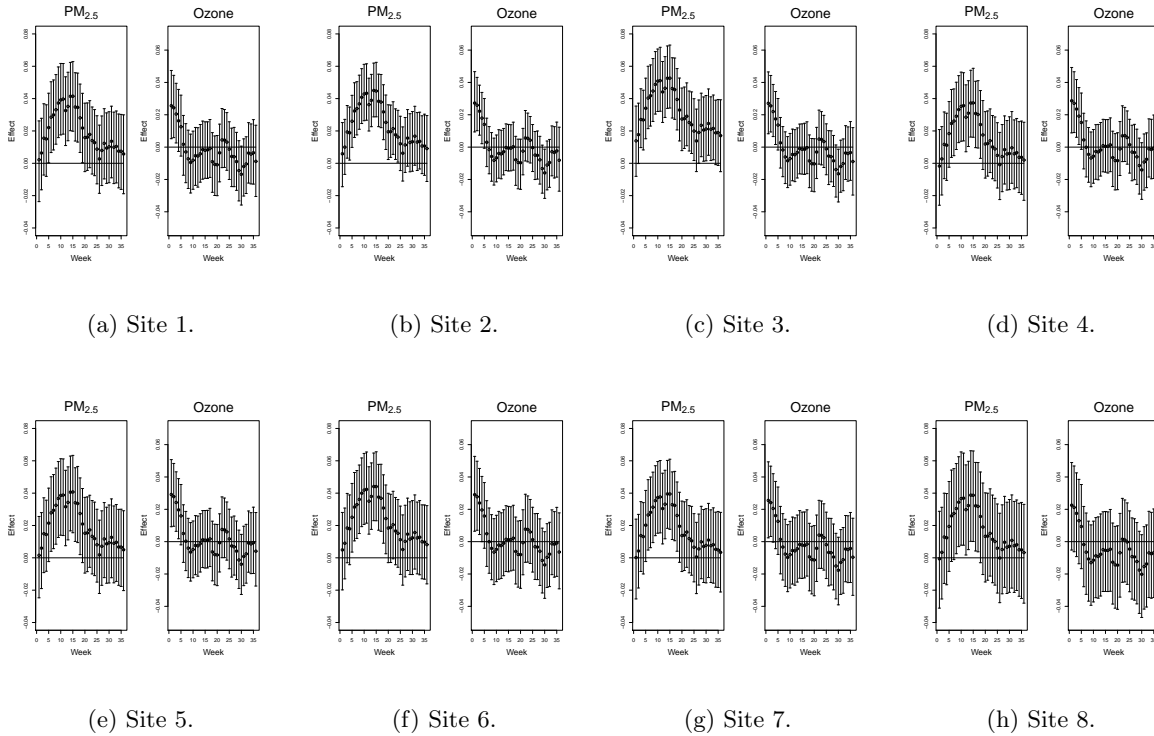

Figure 8: Susceptible windows of exposure for the eight sites created within Harris County, shown on same scale. The eight locations were determined by placing a grid over Harris County and matching women with the closest grid point. The sample sizes for each location are as follows: Site 1: 1,716, Site 2: 15,204, Site 3: 7,889, Site 4: 3,543, Site 5: 2,068, Site 6: 806, Site 7: 804, Site 8: 140. All results based on using the modeled and predicted AQS data from 2002-2004. Posterior medians and 95% credible intervals are displayed.

## 26 Web Figure 9

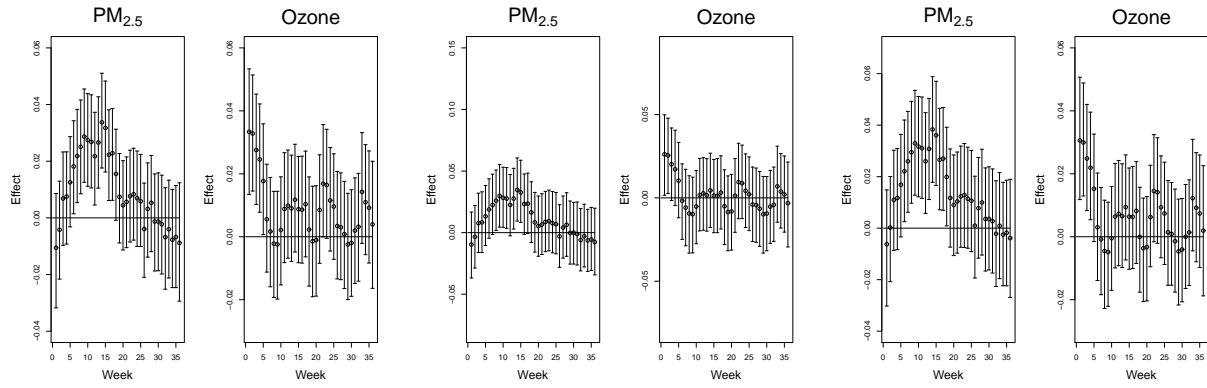

(a) Brazoria: Spatial.

(b) Waller: Spatial.

(c) Montgomery: Spatial.

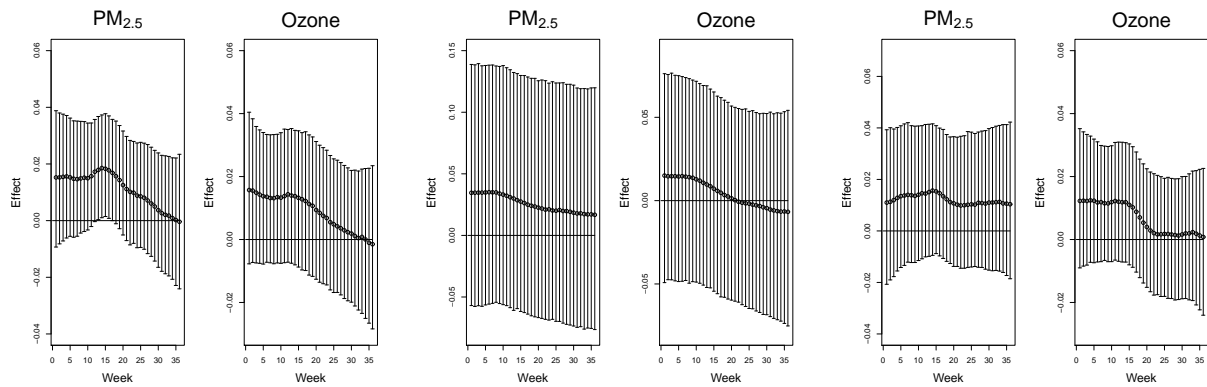

(d) Brazoria: Non-Spatial.

(e) Waller: Non-Spatial.

(f) Montgomery: Non-Spatial.

Figure 9: Susceptible windows of exposure for three selected counties (Brazoria, Waller, Montgomery) based on results from Model 6 (top row) and Model 5 (bottom row). Posterior medians and 95% credible intervals are displayed.
